# Supplementary material for: Nucleoside and nucleotide analogues by catalyst free Huisgen nitrile oxide–alkyne1,3-dipolar cycloaddition
Source: Royal Society of Chemistry journal article supplement (doi:10.1039/b917450h), 2009-10-28
Supplement: b917450h.pdf [file b917450h.pdf]

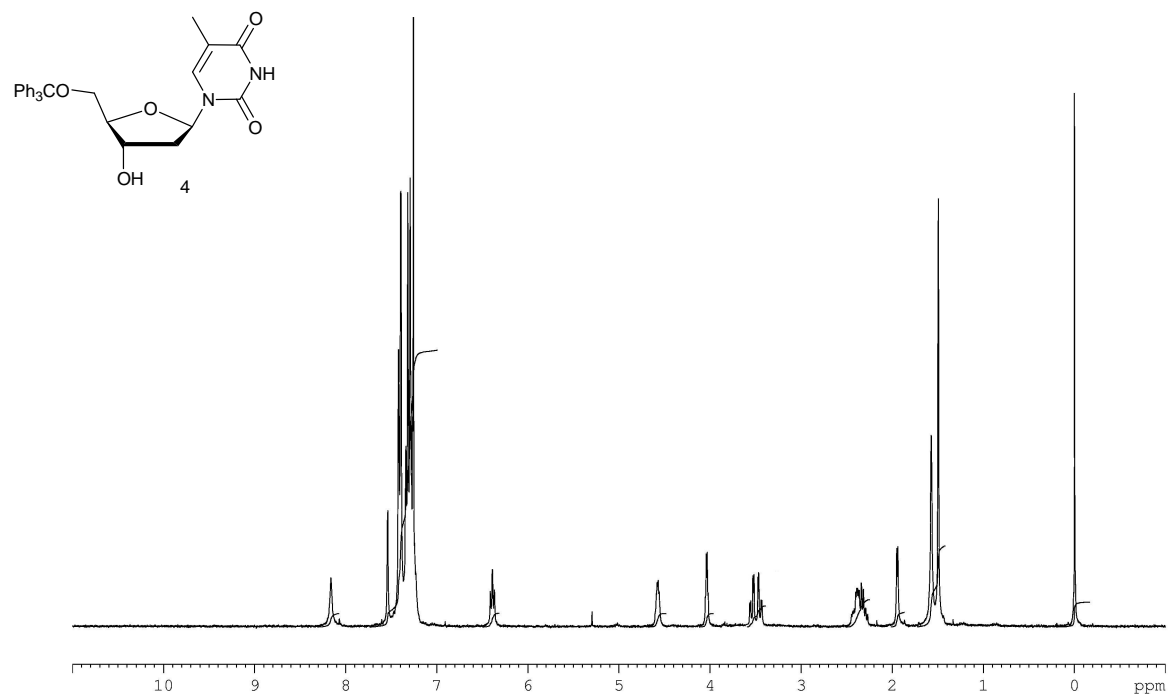

<sup>1</sup>H NMR spectrum of **4**

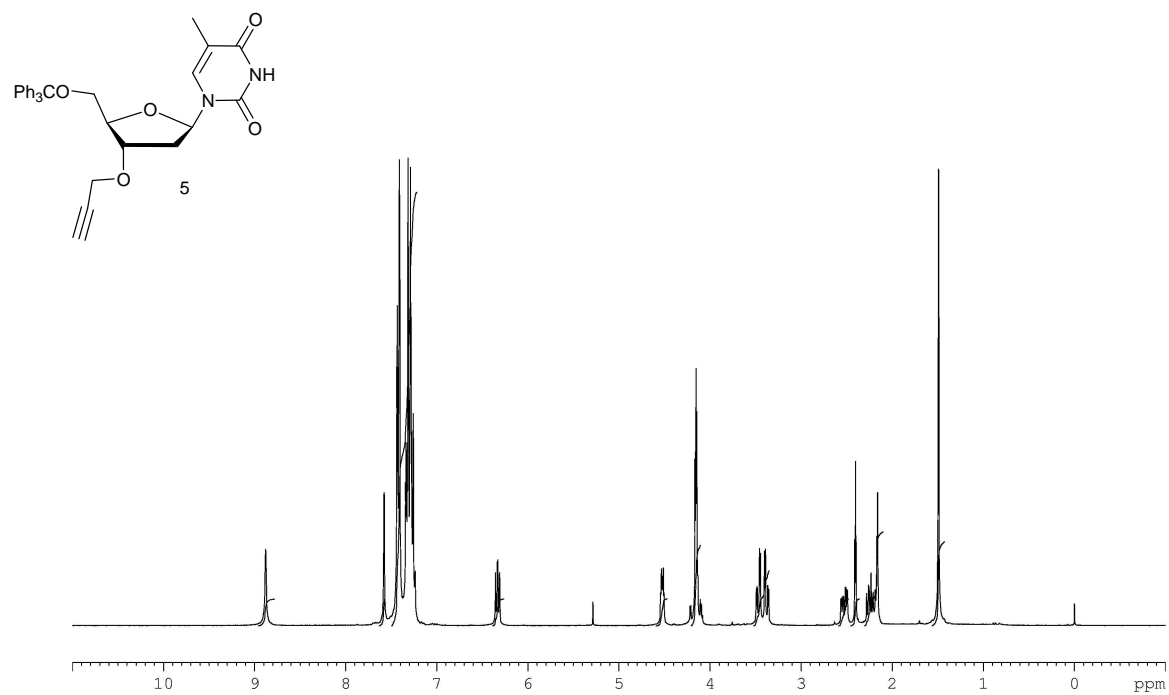

<sup>1</sup>H NMR spectrum of **5**

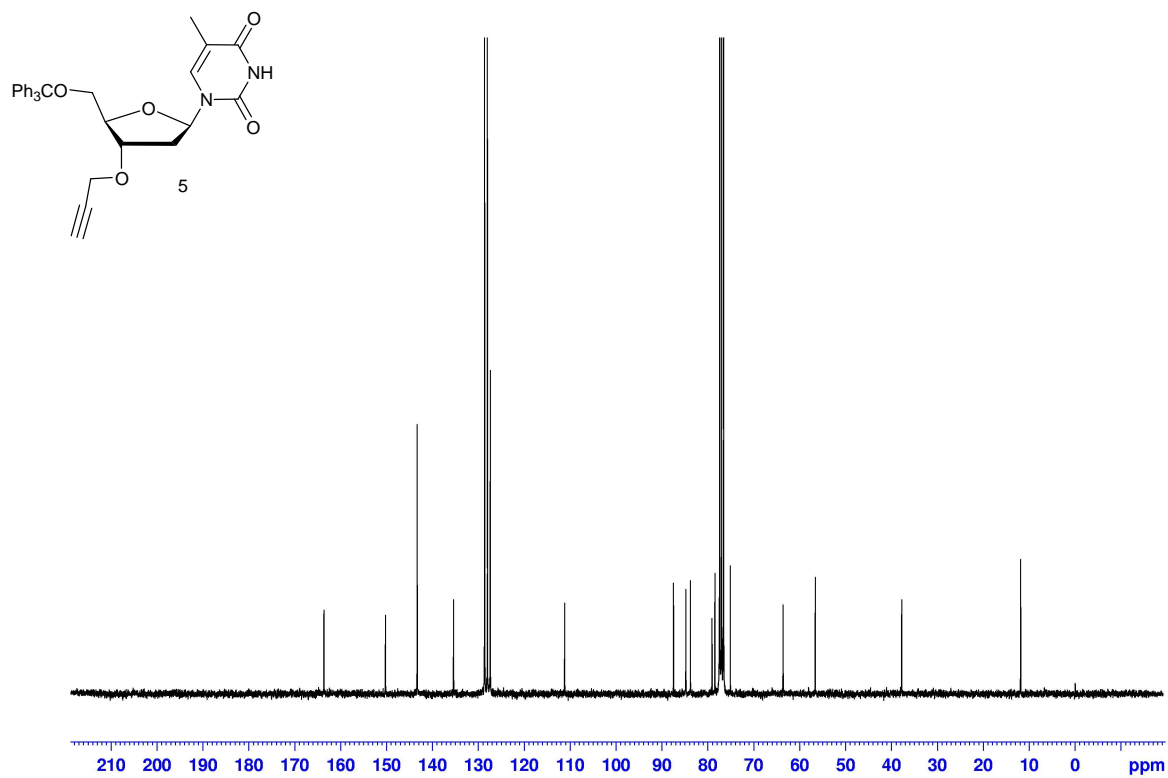

$^{13}\text{C}$  NMR spectrum of **5**

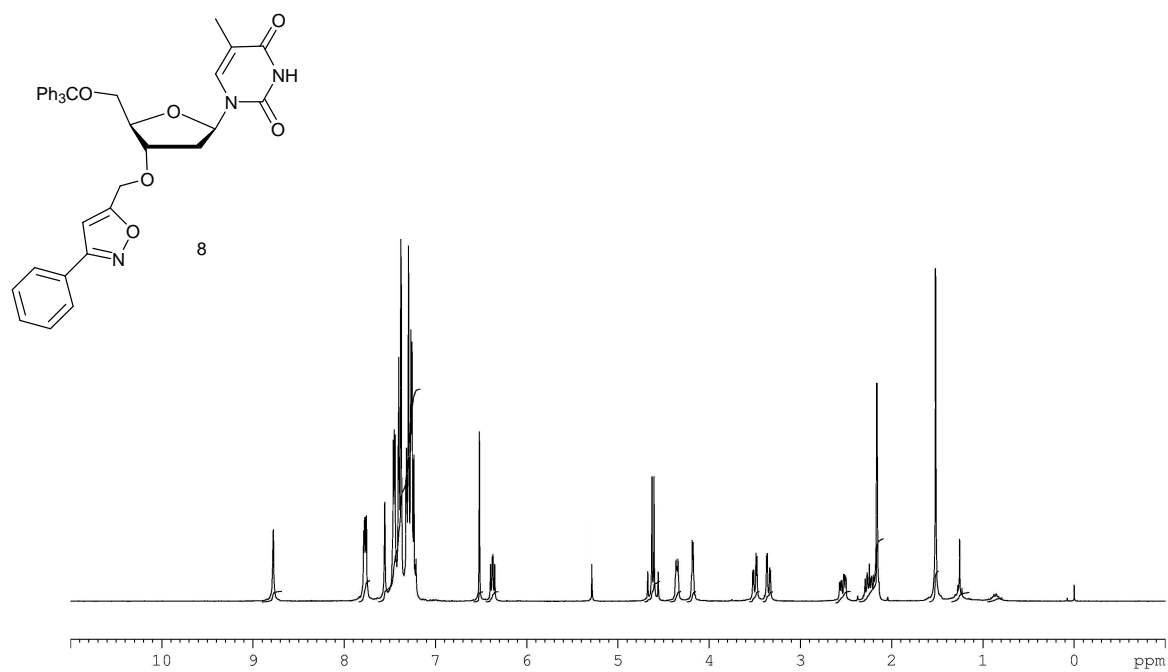

$^1\text{H}$  NMR spectrum of **8**

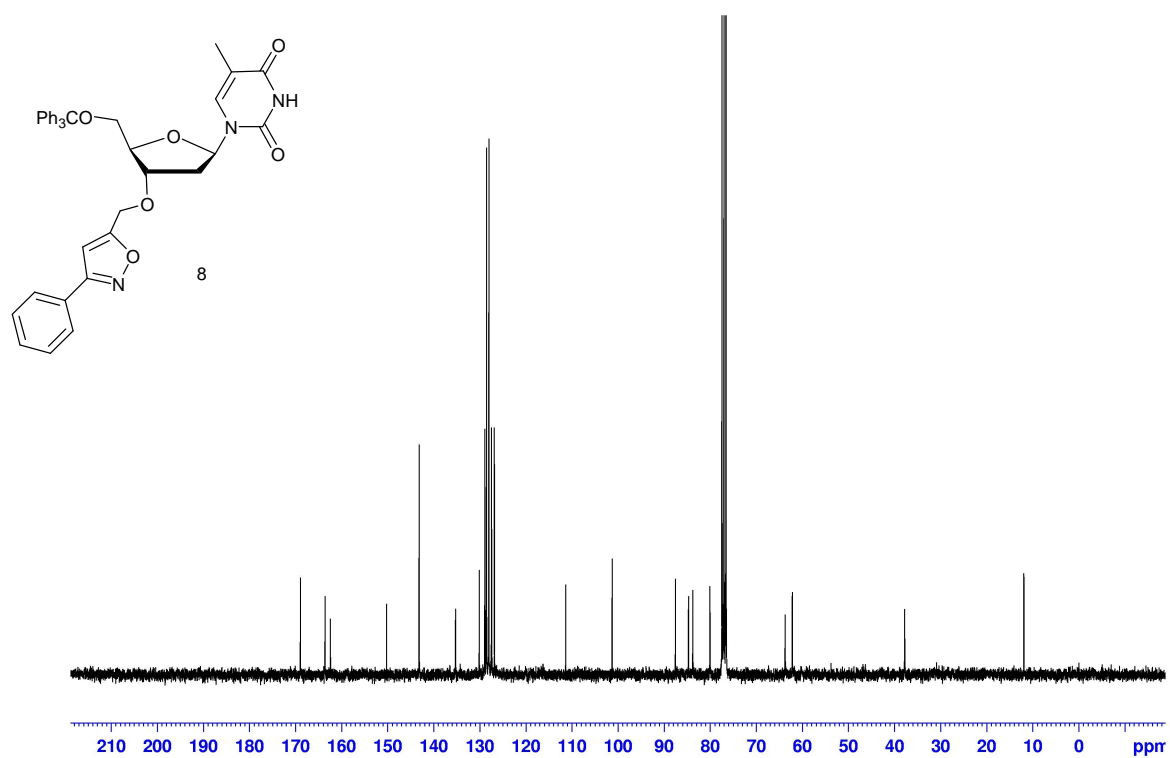

$^{13}\text{C}$  NMR spectrum of **8**

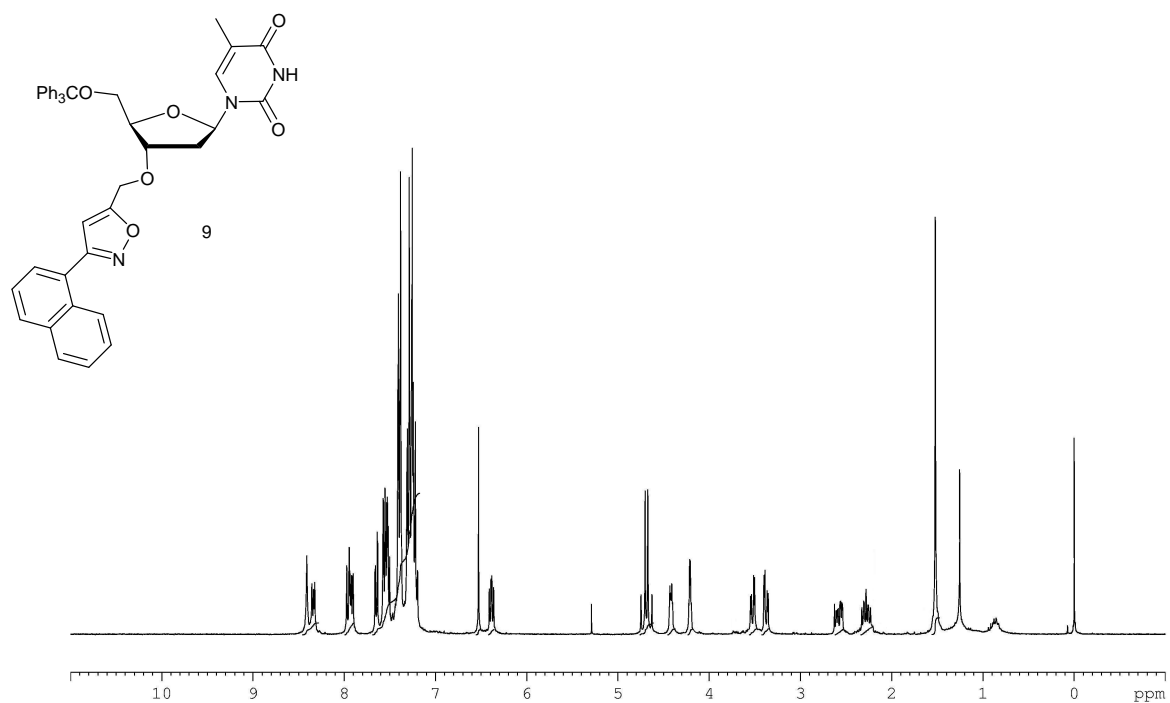

$^1\text{H}$  NMR spectrum of **9**

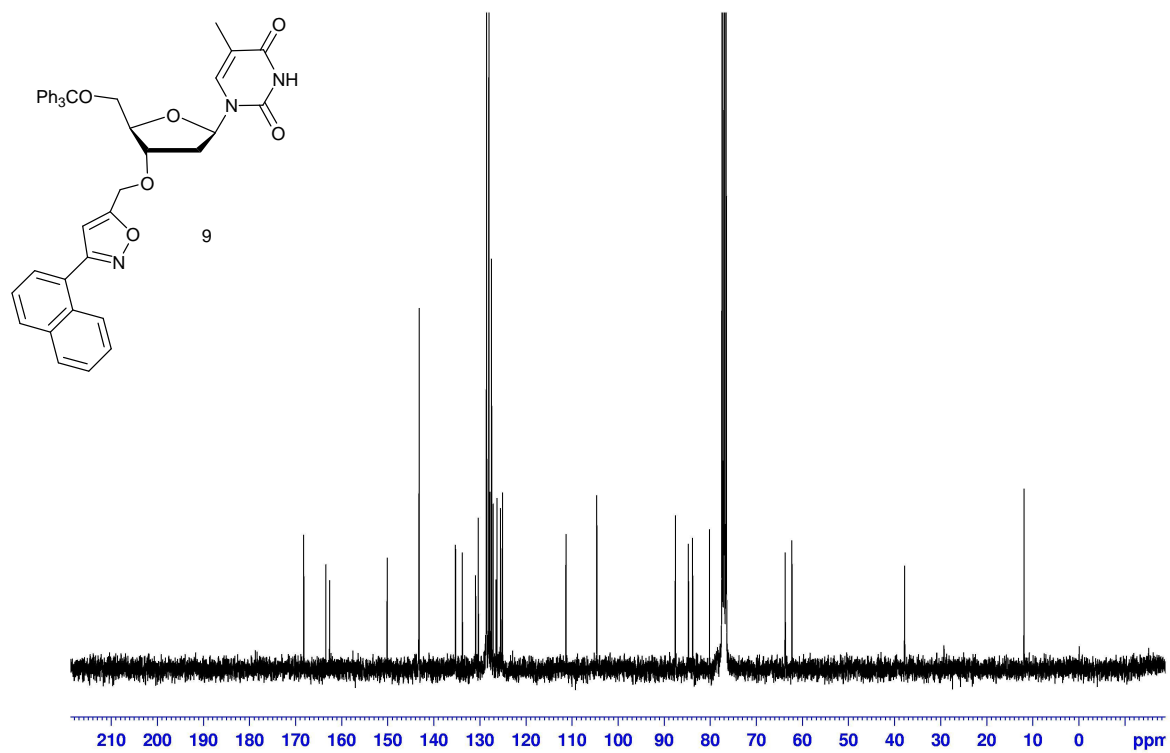

<sup>13</sup>C NMR spectrum of **9**

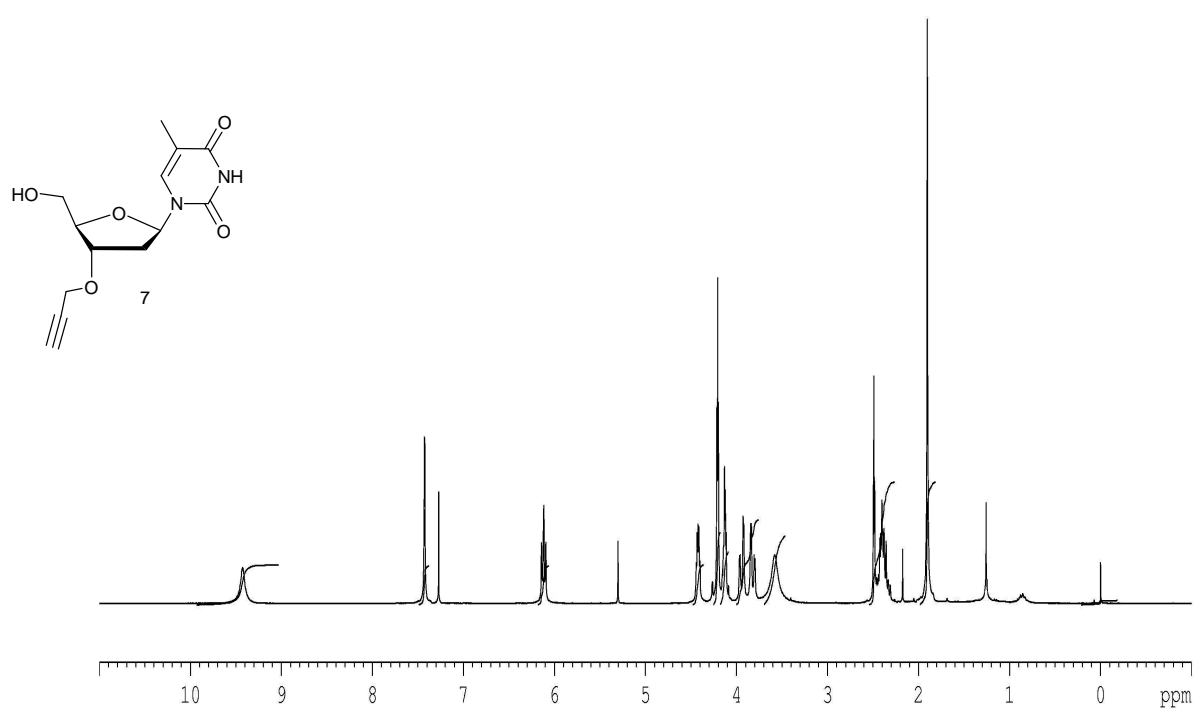

<sup>1</sup>H NMR spectrum of **7**



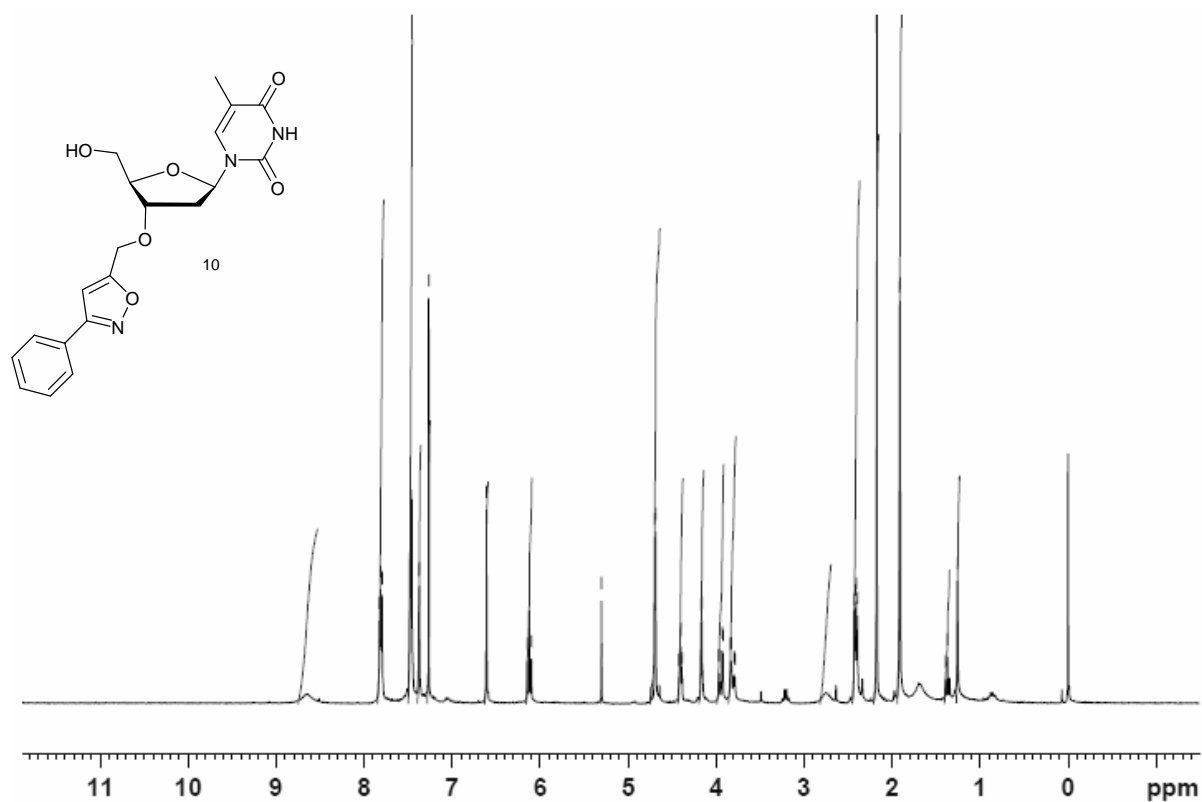

<sup>1</sup>H NMR spectrum of **10**

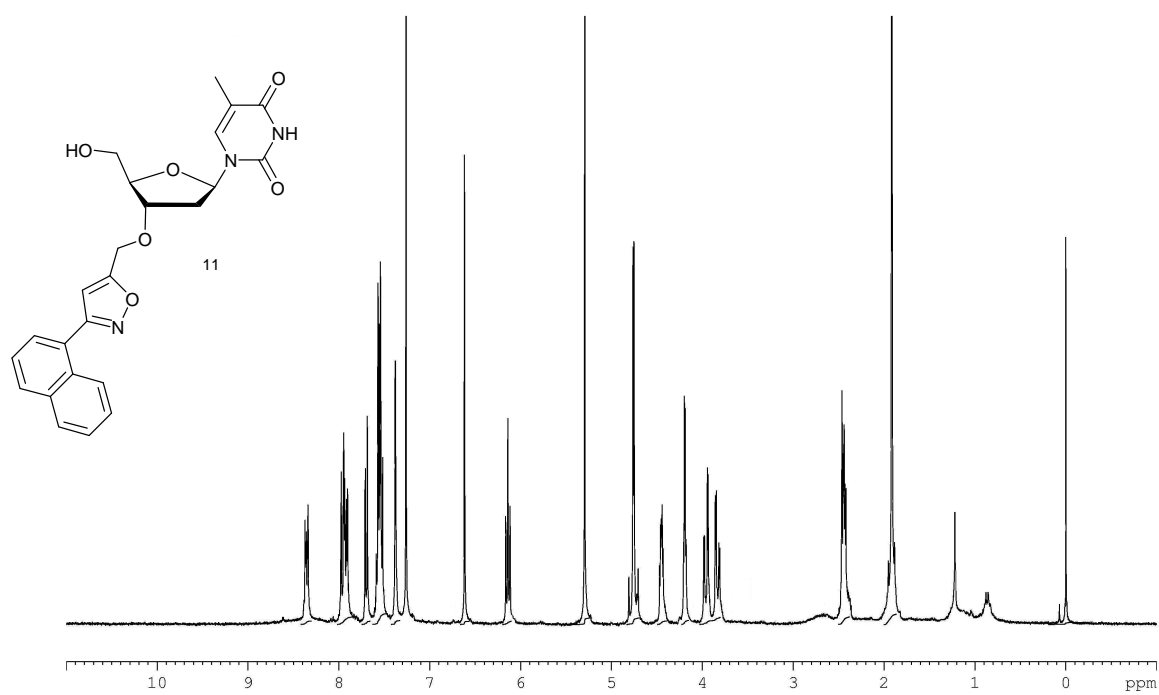

<sup>1</sup>H NMR spectrum of **11**

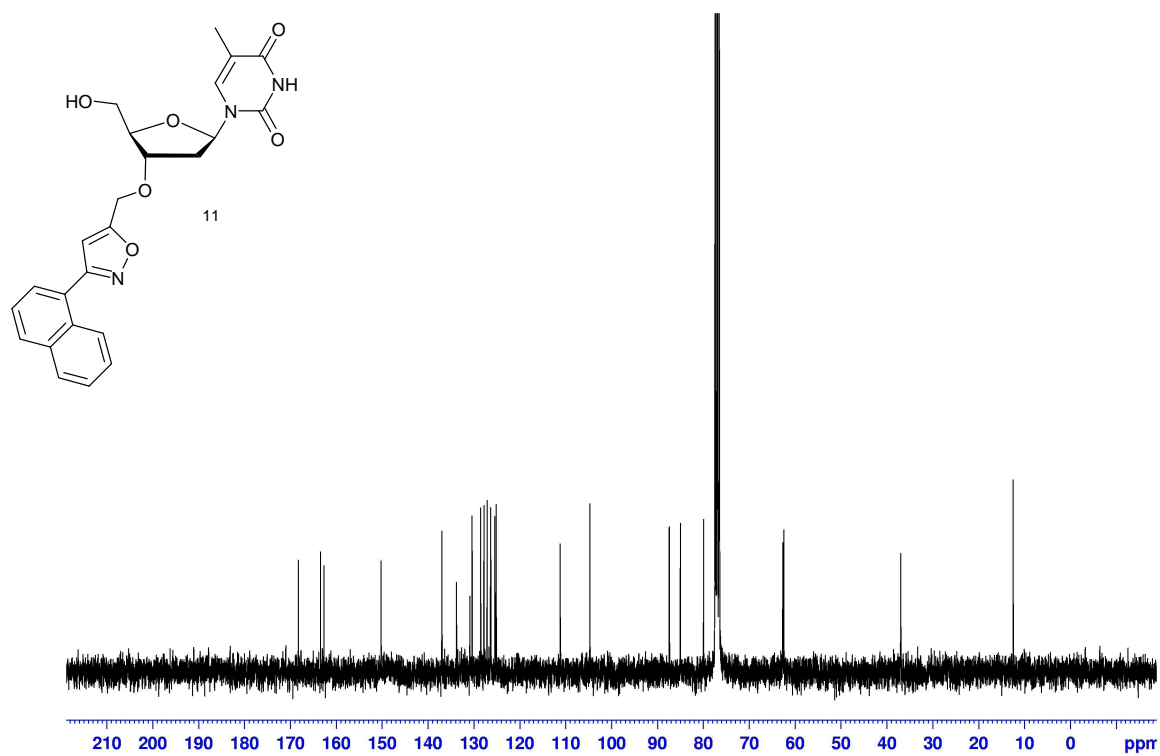

$^{13}\text{C}$  NMR spectrum of **11**

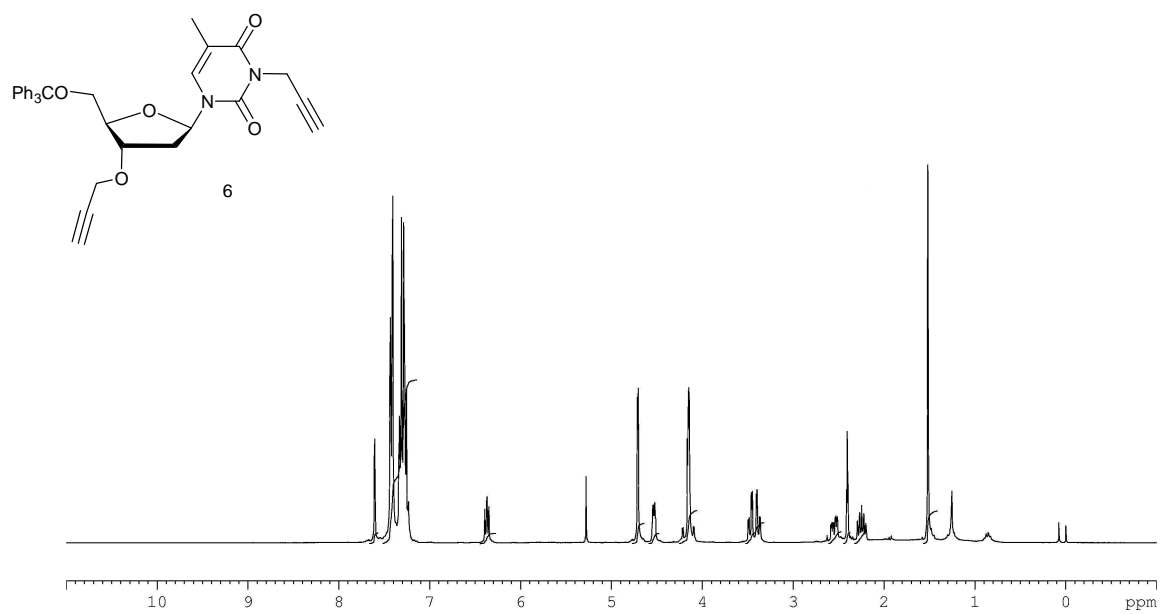

$^1\text{H}$  NMR spectrum of **6**

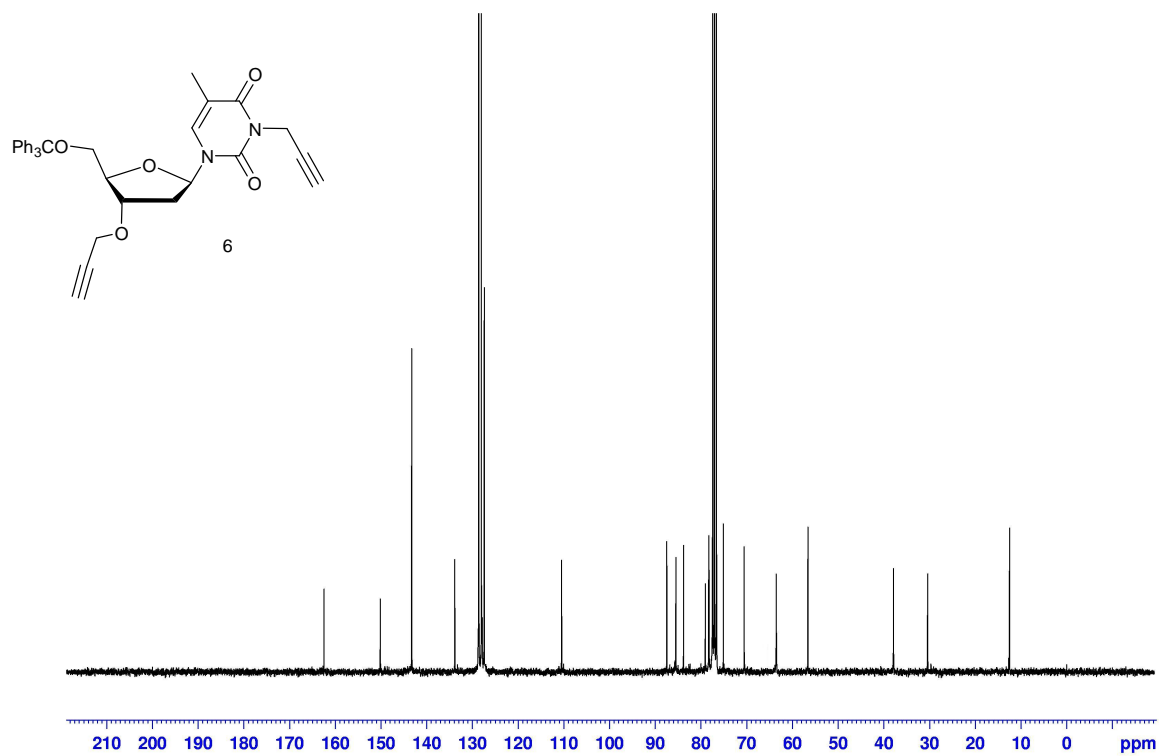

$^{13}\text{C}$  NMR spectrum of **6**

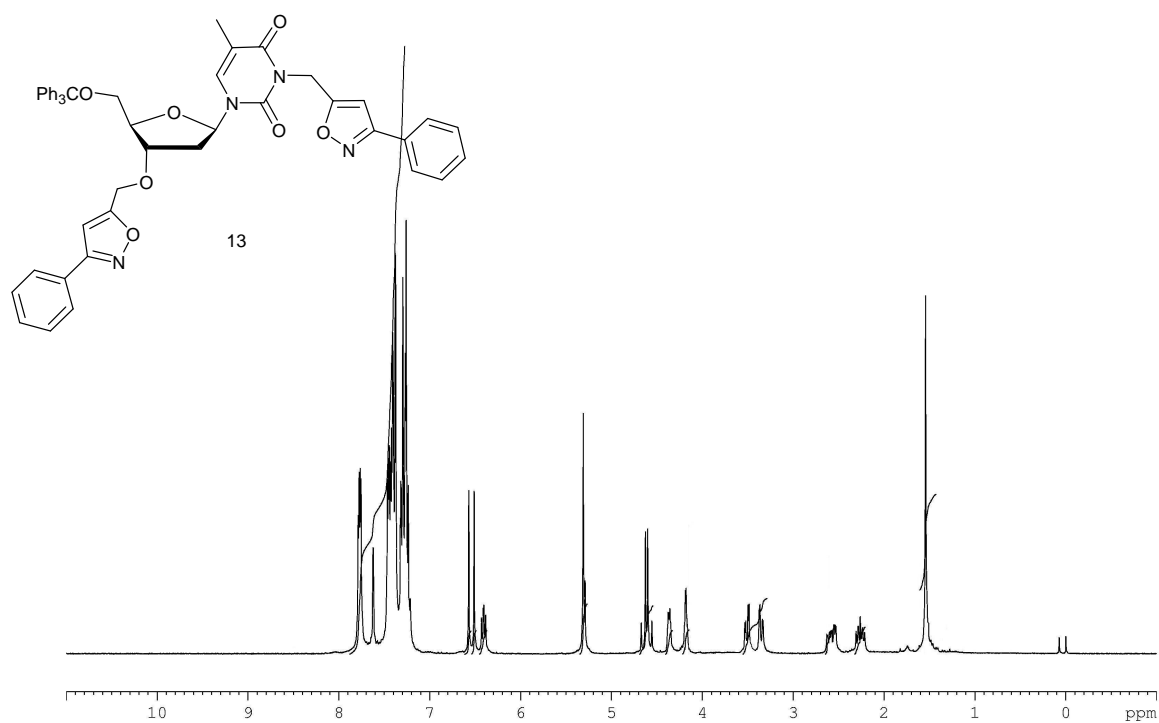

$^1\text{H}$  NMR spectrum of **13**

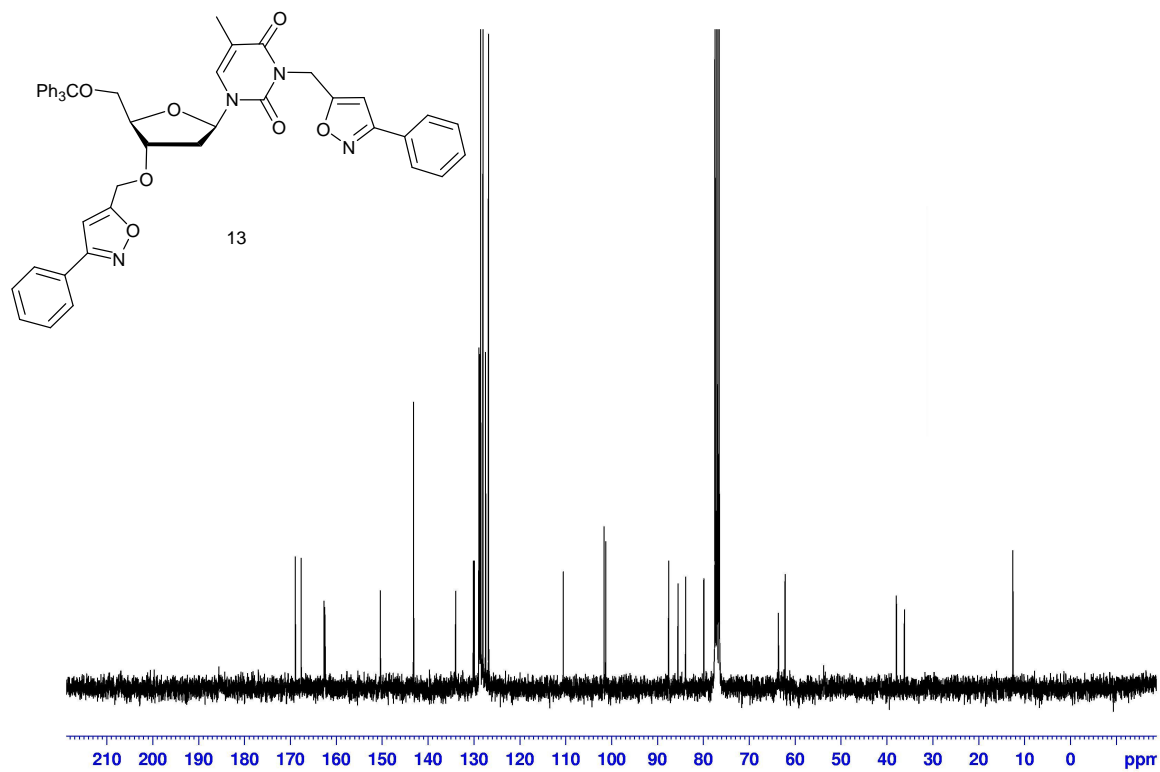

$^{13}\text{C}$  NMR spectrum of **13**

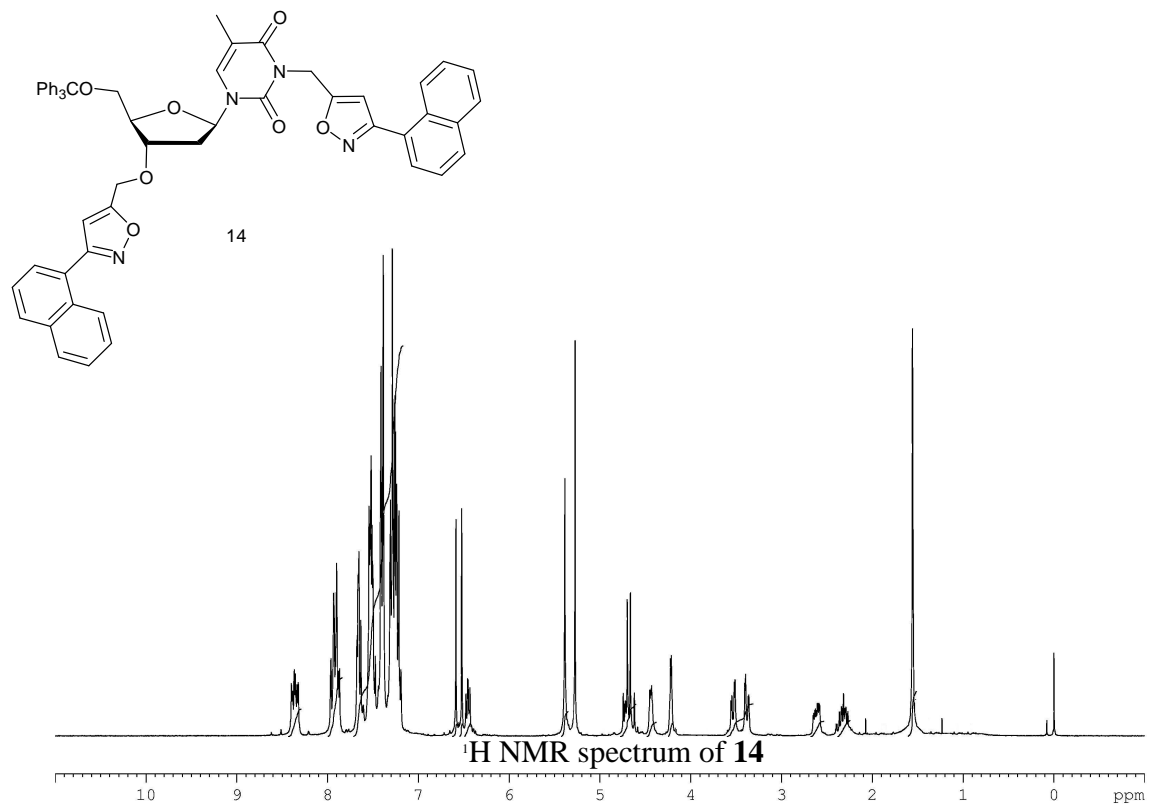

$^1\text{H}$  NMR spectrum of **14**

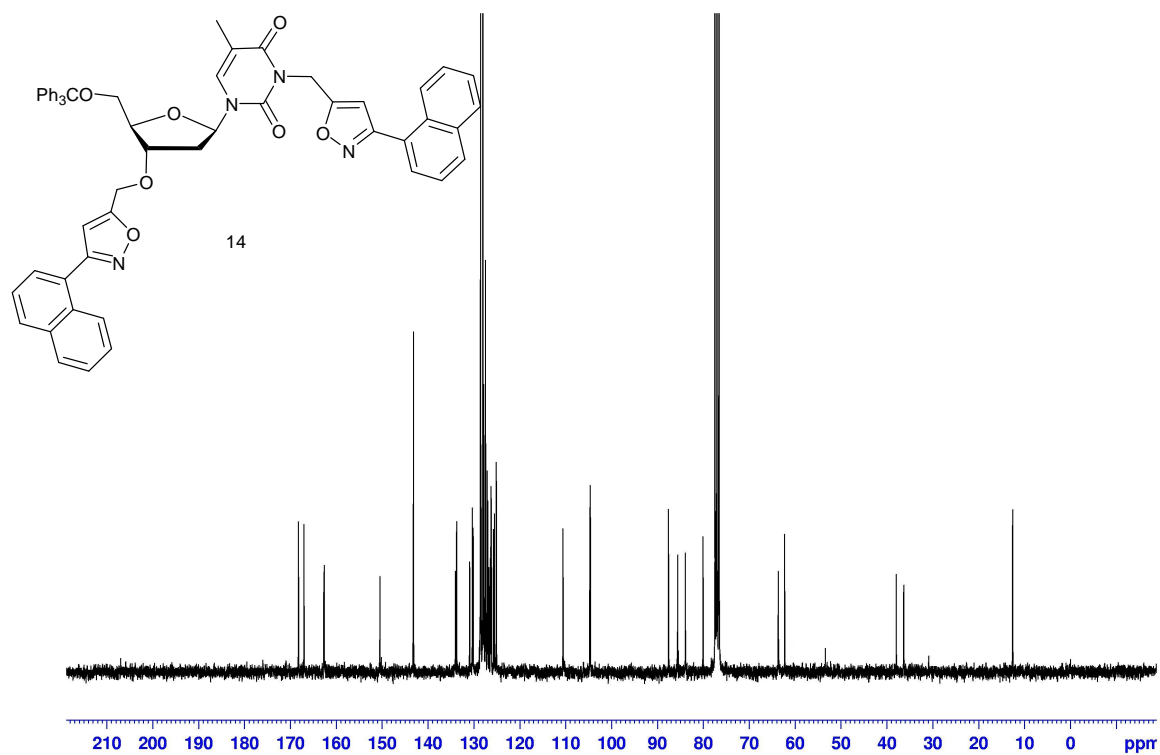

$^{13}\text{C}$  NMR spectrum of **14**

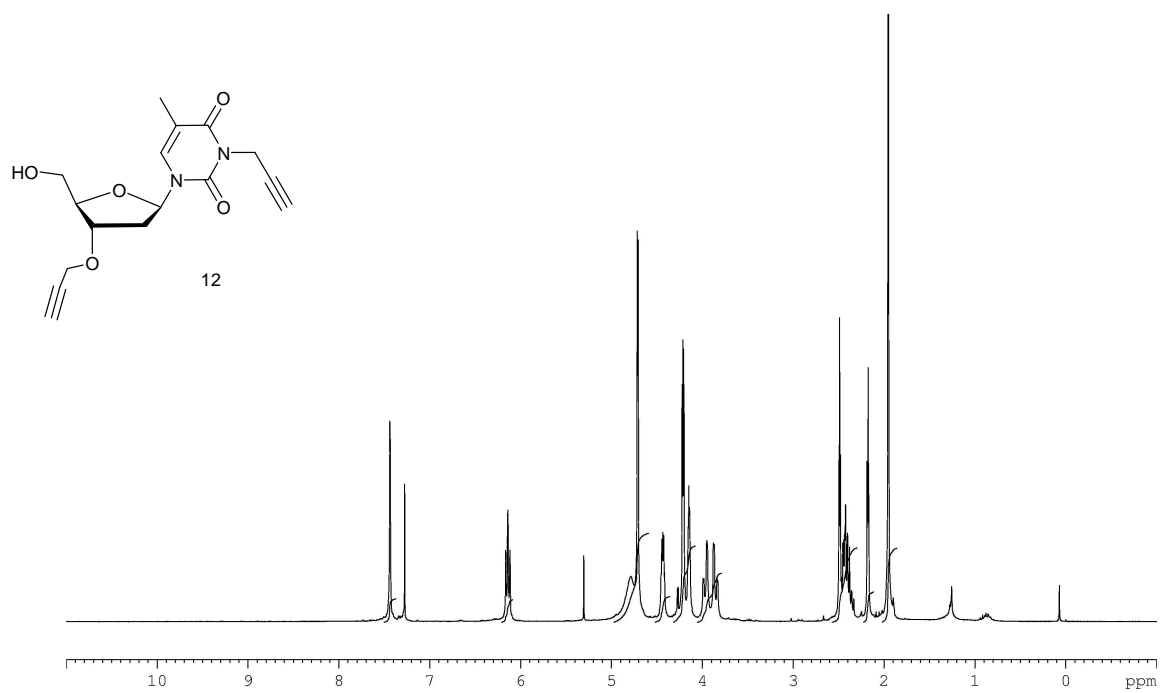

$^1\text{H}$  NMR spectrum of **12**

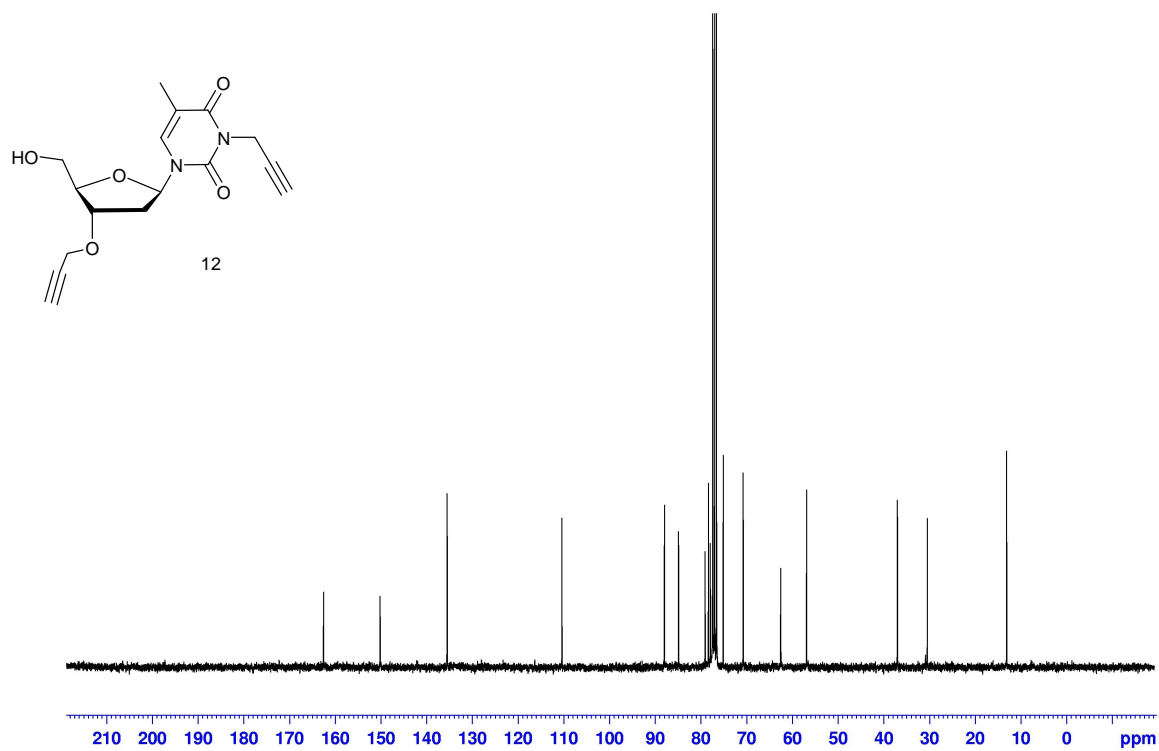

$^{13}\text{C}$  NMR spectrum of **12**

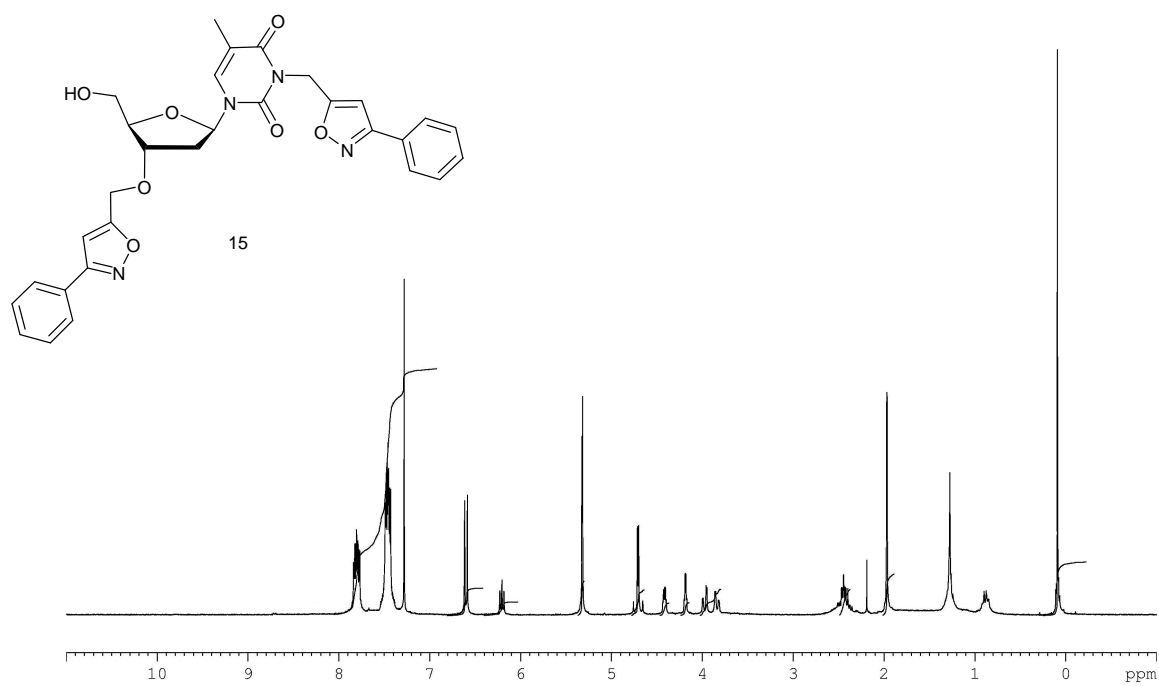

$^1\text{H}$  NMR spectrum of **15**

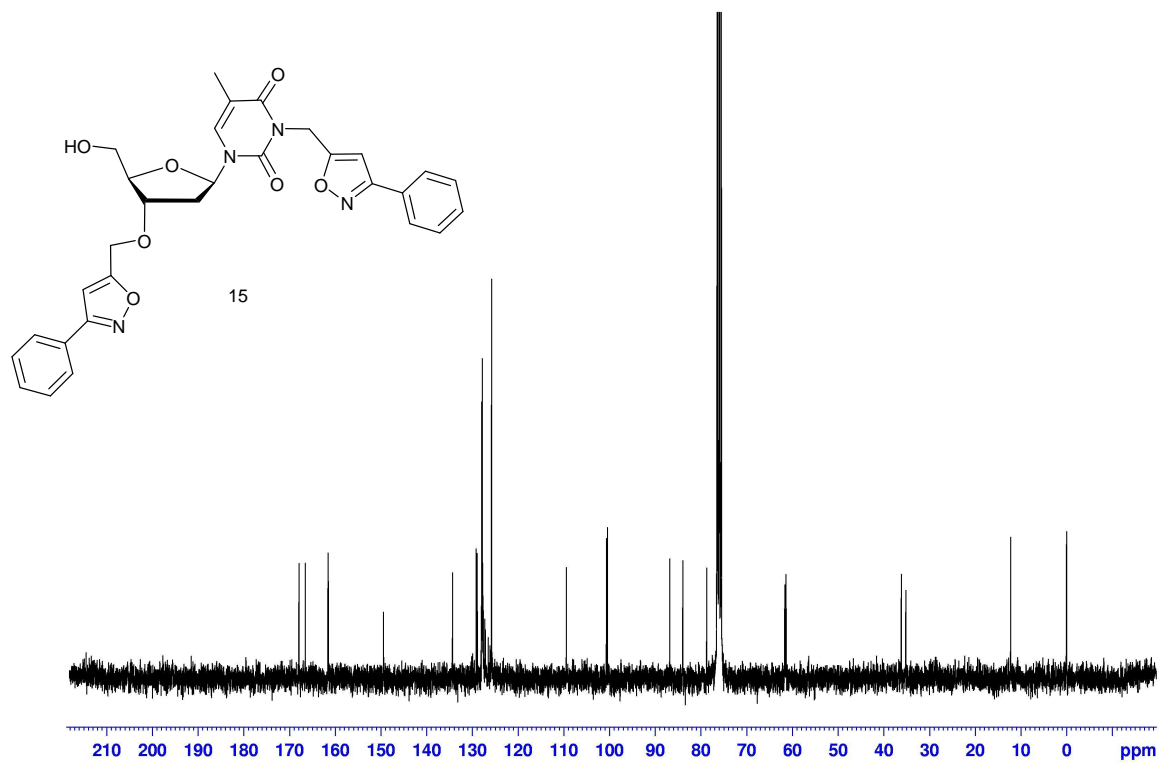

$^{13}\text{C}$  NMR spectrum of **15**

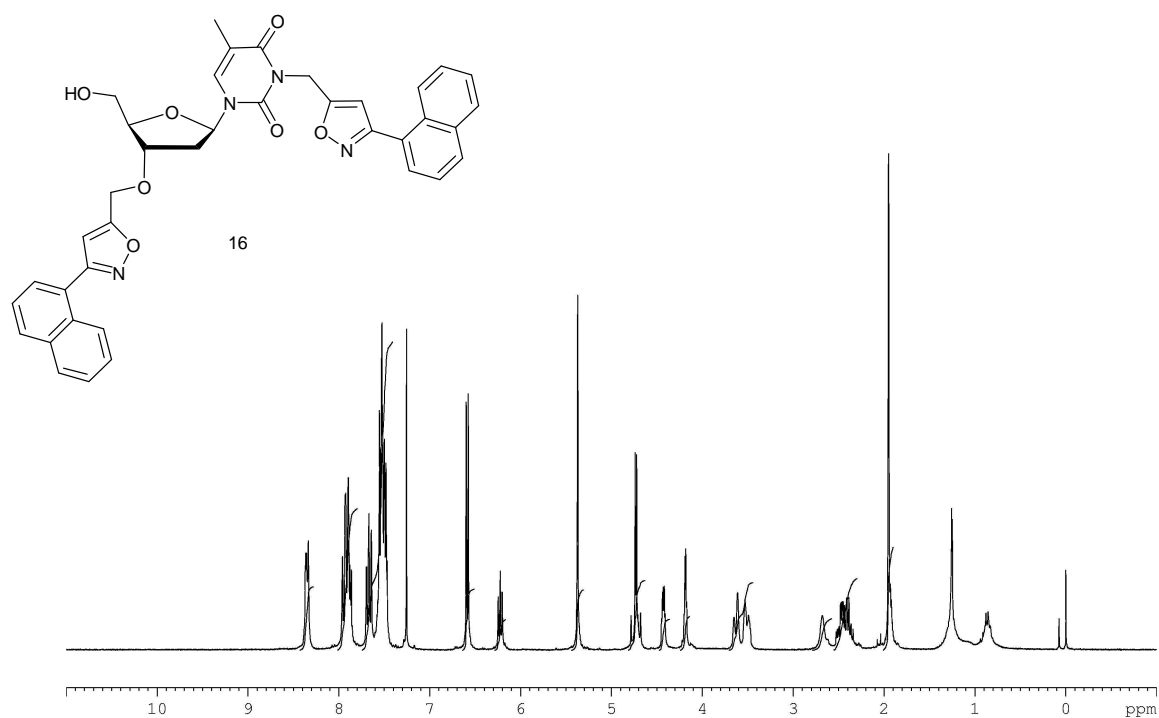

$^1\text{H}$  NMR spectrum of **16**

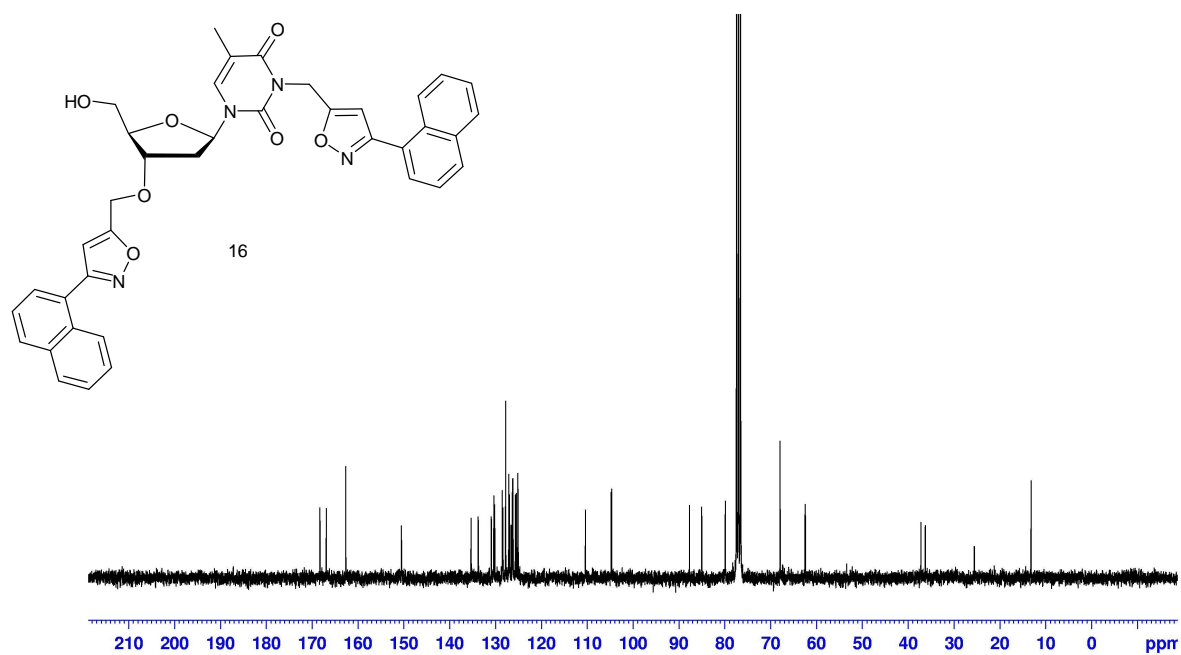

$^{13}\text{C}$  NMR spectrum of **16**

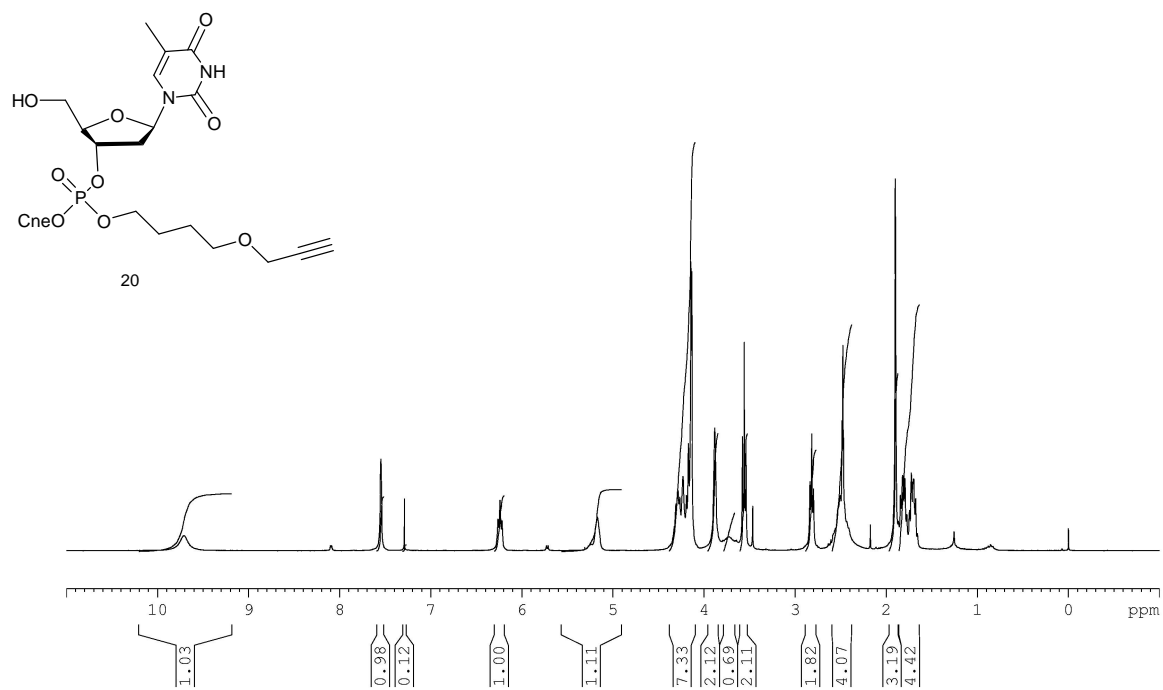

$^1\text{H}$  NMR spectrum of **20**



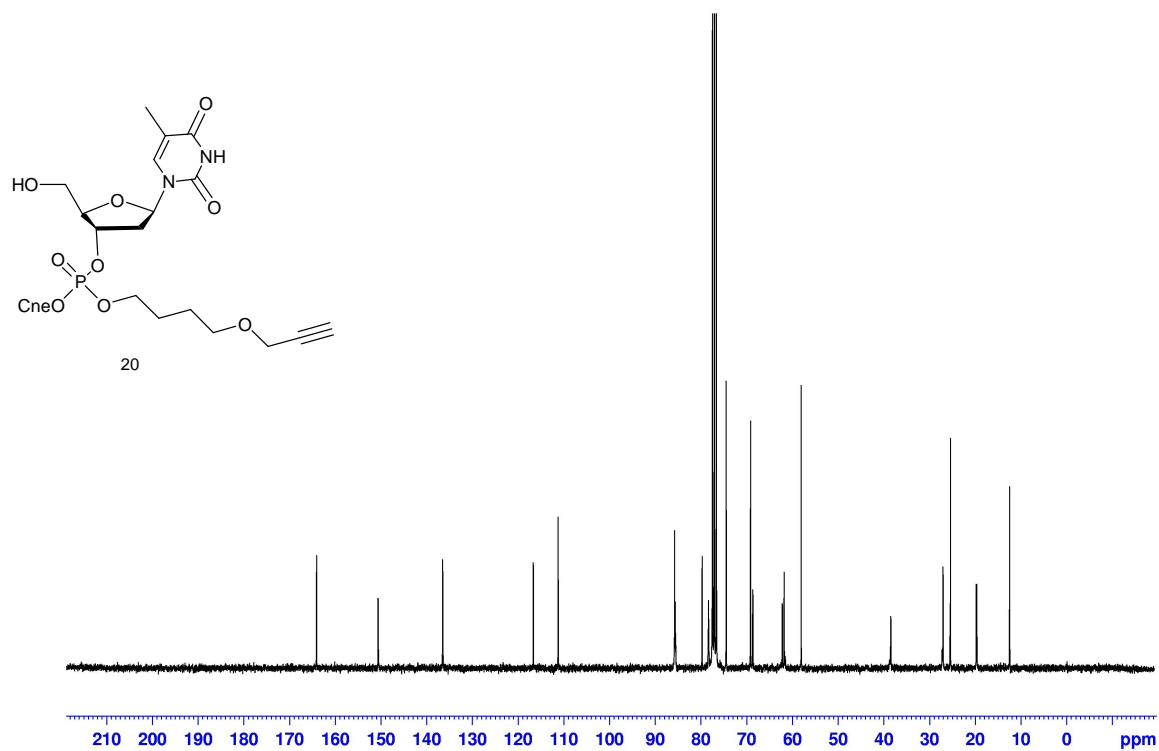

<sup>13</sup>C NMR spectrum of **20**

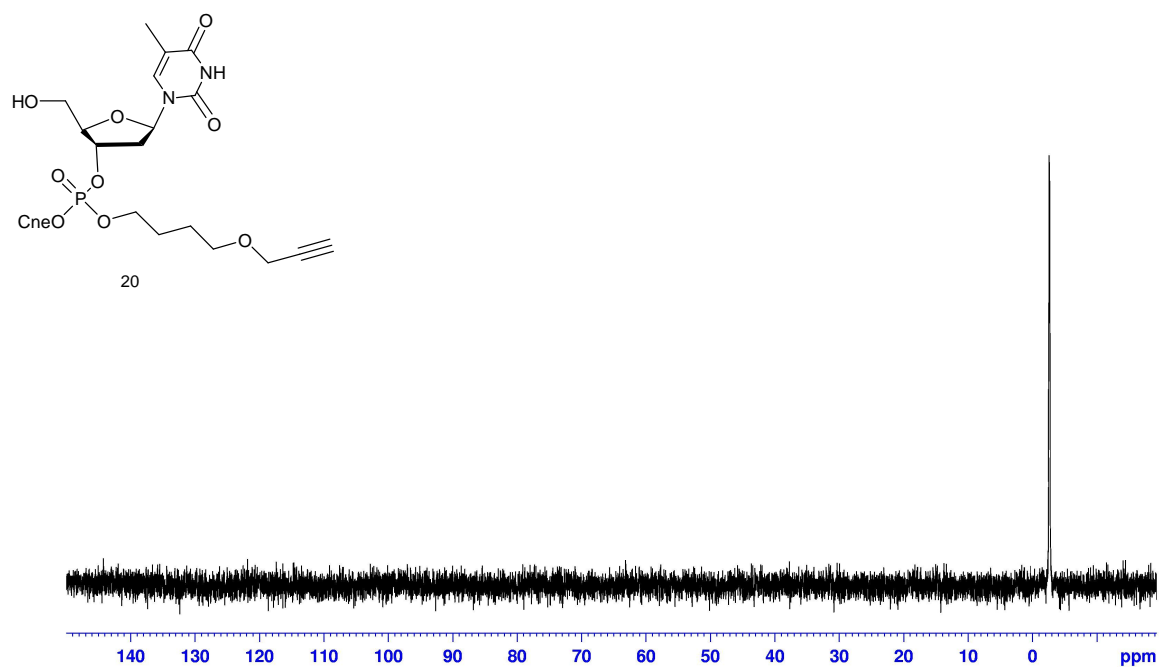

<sup>31</sup>P NMR spectrum of **20**

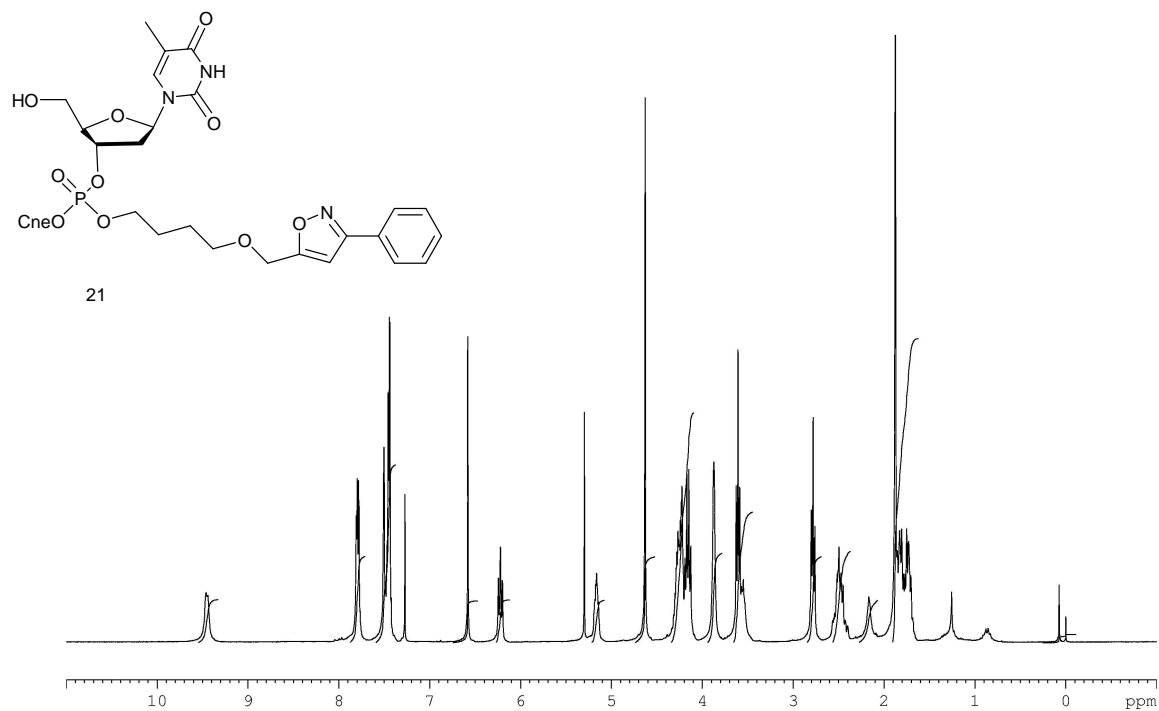

<sup>1</sup>H NMR spectrum of **21**

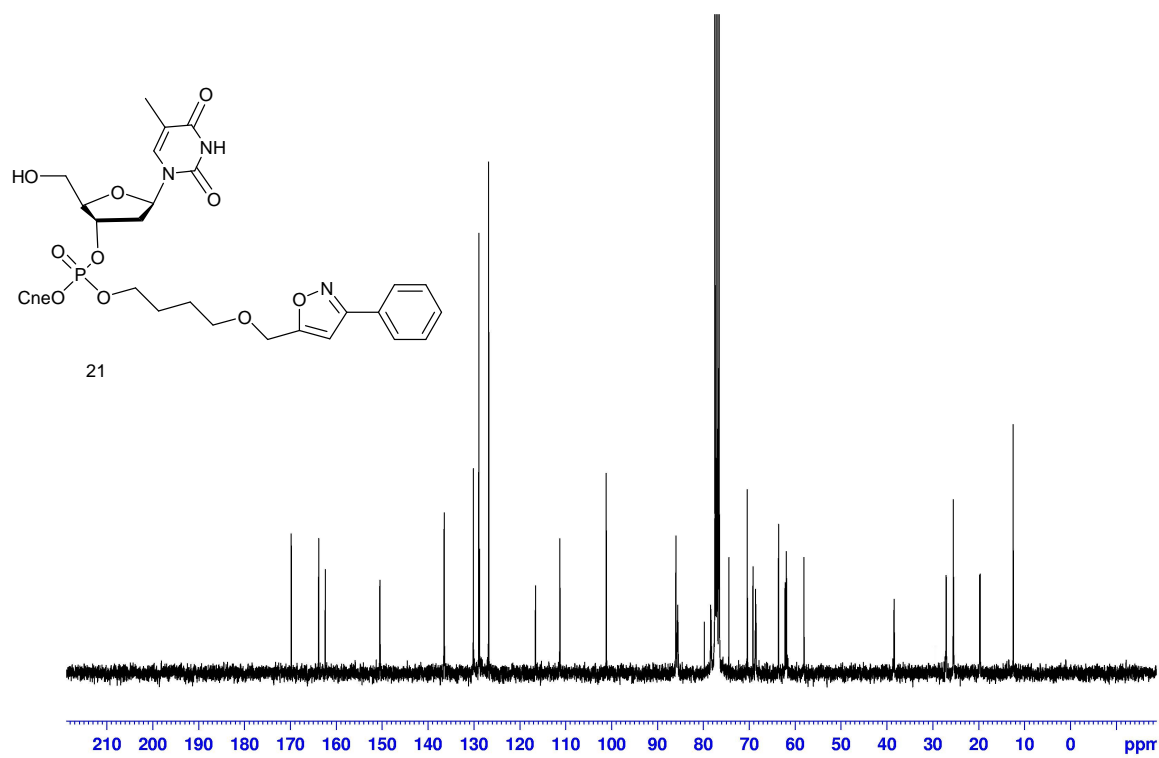

<sup>13</sup>C NMR spectrum of **21**

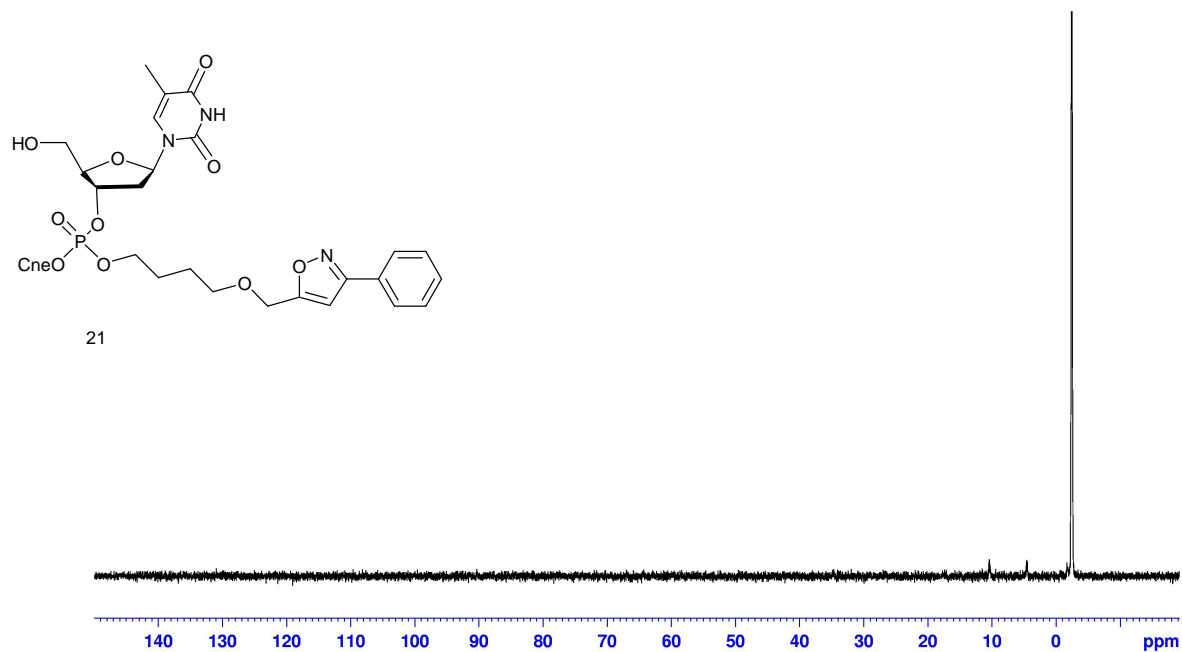

$^{31}\text{P}$  NMR spectrum of **21**

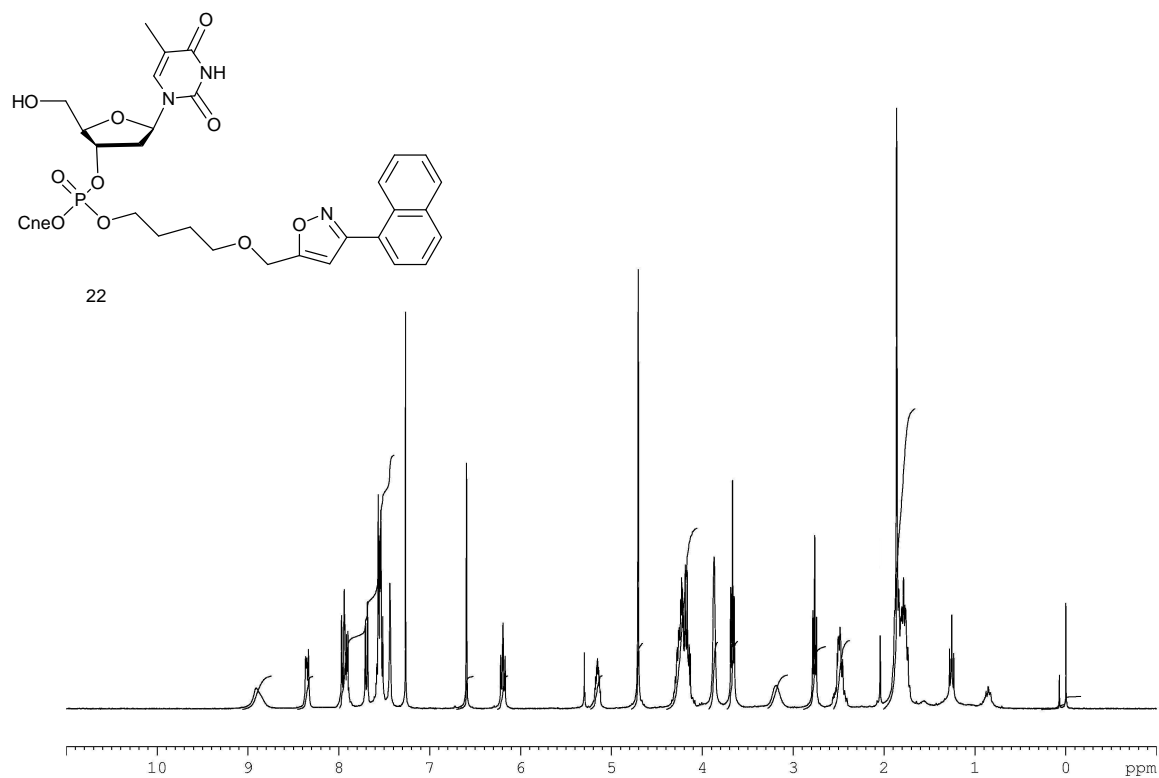

$^1\text{H}$  NMR spectrum of **22**

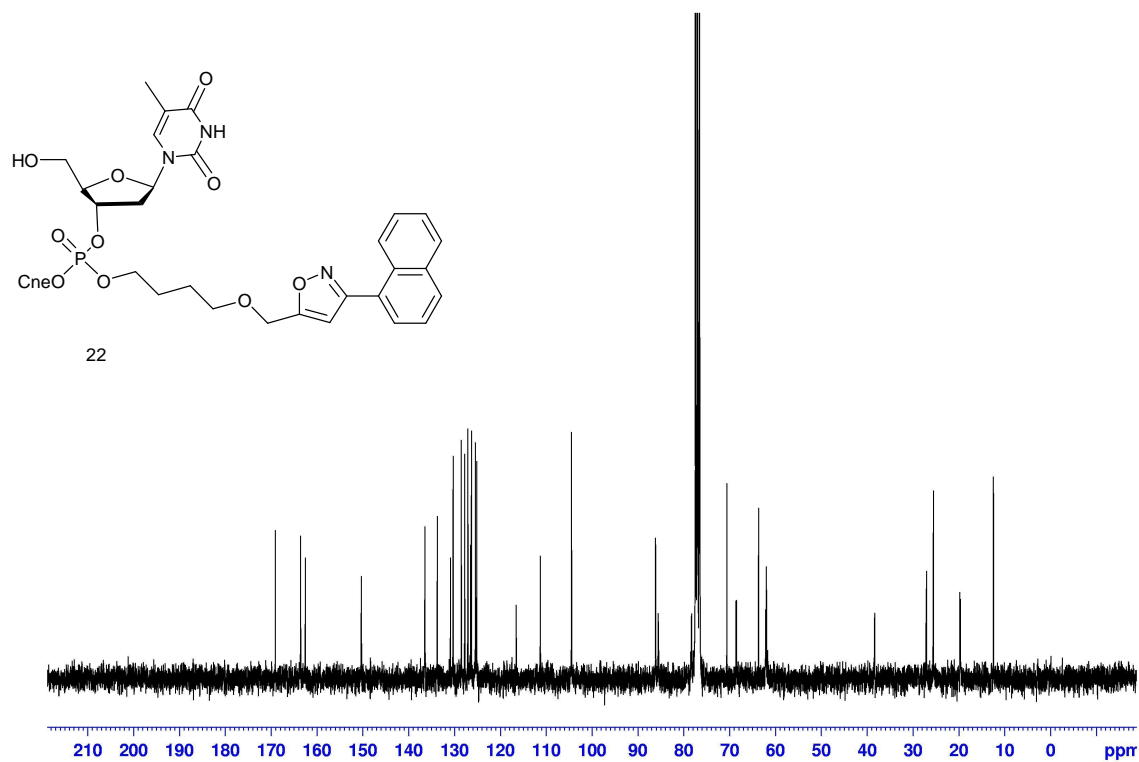

<sup>13</sup>C NMR spectrum of 22

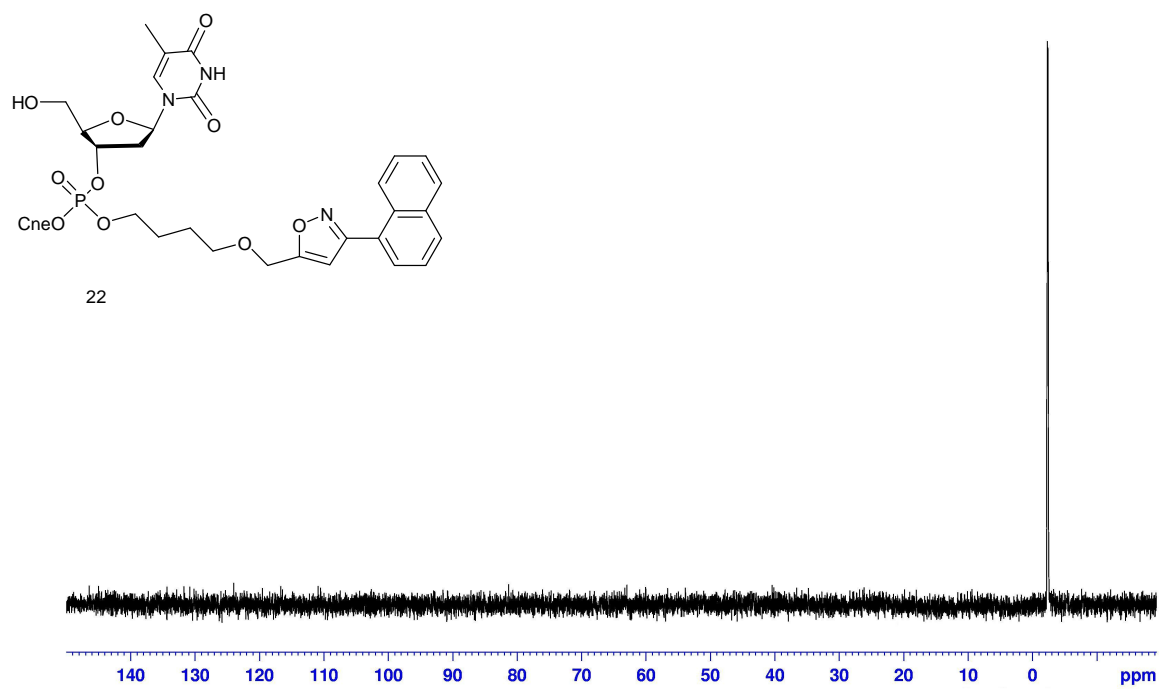

<sup>31</sup>P NMR spectrum of 22
